# Supplementary material for: Formulation and evaluation of PVA-based composite hydrogels: physicochemical, leachables, and in vitro immunogenicity studies
Source: Royal Society of Chemistry journal article supplement (doi:10.1039/d4tb02181a), 2025-01-01
Supplement: d4tb02181a1.pdf [file d4tb02181a1.pdf]

## Supplementary Information

Formulation and evaluation of PVA-based composite hydrogels: physicochemical, leachables, and in vitro immunogenicity studies

Achmad Himawan, Anna Korelidou, Ana M. Pérez-Moreno, Juan L Paris, Juan Dominguez-Robles, Lalitkumar K Vora, Andi Dian Permana, Eneko Larraneta, Robert Graham, Christopher J Scott, Ryan F Donnelly

### **Preparation of the polymeric stock solutions**

Poly(vinyl alcohol) (PVA): A 25% w/w PVA solution was created by mixing PVA granules with deionized water and heating the mixture at 80°C overnight with intermittent stirring.

Poly(vinylpyrrolidone) (PVP): A 40% w/w PVP solution was prepared by dissolving PVP powder in deionized water, allowing the mixture to hydrate overnight, and then stirring until completely dissolved.

Chitosan: A 5% w/w chitosan solution was made by combining chitosan powder with 10% v/v acetic acid. The mixture was allowed to hydrate overnight with a rotator mixer set to 12 rpm.

## Freeze-drying cycles

| Step | Temp (°C) | Pressure (torr) | Time (min) | Step |
|------|-----------|-----------------|------------|------|
| 1    | 5         | 760             | 10         | Hold |
| 2    | -40       | 760             | 60         | Ramp |
| 3    | -35       | 190             | 180        | Hold |
| 4    | -30       | 190             | 60         | Ramp |
| 5    | -30       | 190             | 180        | Hold |
| 6    | -25       | 190             | 60         | Ramo |
| 7    | -25       | 190             | 180        | Hold |
| 8    | 25        | 190             | 120        | Ramp |
| 9    | 25        | 190             | 360        | Hold |
| 10   | 25        | 50              | 360        | Hold |

## **Cell culture condition**

### *DC2.4 Cell Culture and Maintenance:*

This study utilized the DC2.4 mouse dendritic cell line. These cells were cultured in RPMI-1640 medium supplemented with 10% fetal bovine serum, nonessential amino acids, L-glutamine, and  $\beta$ -mercaptoethanol.

### *Cell Thawing and Expansion:*

Upon thawing, DC2.4 cells were transferred to a sterile tube, diluted with 9 mL of RPMI-1640 medium, centrifuged at 300 rcf for 2-3 minutes, and resuspended in 15 mL of fresh medium. The cells were then transferred to a T75 tissue culture flask and incubated at 37°C with 5% CO<sub>2</sub>. The medium was changed every two or three days until the cells reached confluence.

### *Cell Passage and Seeding:*

For cell passage, the culture medium was removed from the flask, and the cells were rinsed twice with 1× PBS (pH 7.4; 10 mM). Trypsin-EDTA solution (0.25% trypsin, 1 mM EDTA) was added to detach the cells, and the mixture was incubated for 3-5 minutes at 37°C. The cells were then resuspended in 8 mL of RPMI-1640 medium, transferred to a 15 mL conical tube, and centrifuged at 300 rcf for 3-5 minutes. The supernatant was removed, and the cells were resuspended in 2 mL of RPMI-1640 medium. A 15  $\mu$ L aliquot of the cell suspension was taken and placed on a cell counting slide. The cells were counted manually with a confocal microscope at 10X magnification. A dilution was made to seed the cells into a 96-well culture plate with a cell density of 500 cells/ $\mu$ L. 100  $\mu$ L of the diluted cell suspension was added to each well, and the remaining cells were passaged. The cells in the well plate were incubated in a humidified incubator at 37°C with 5% CO<sub>2</sub>.

Schematic diagram for cell treatment in the cytotoxicity study

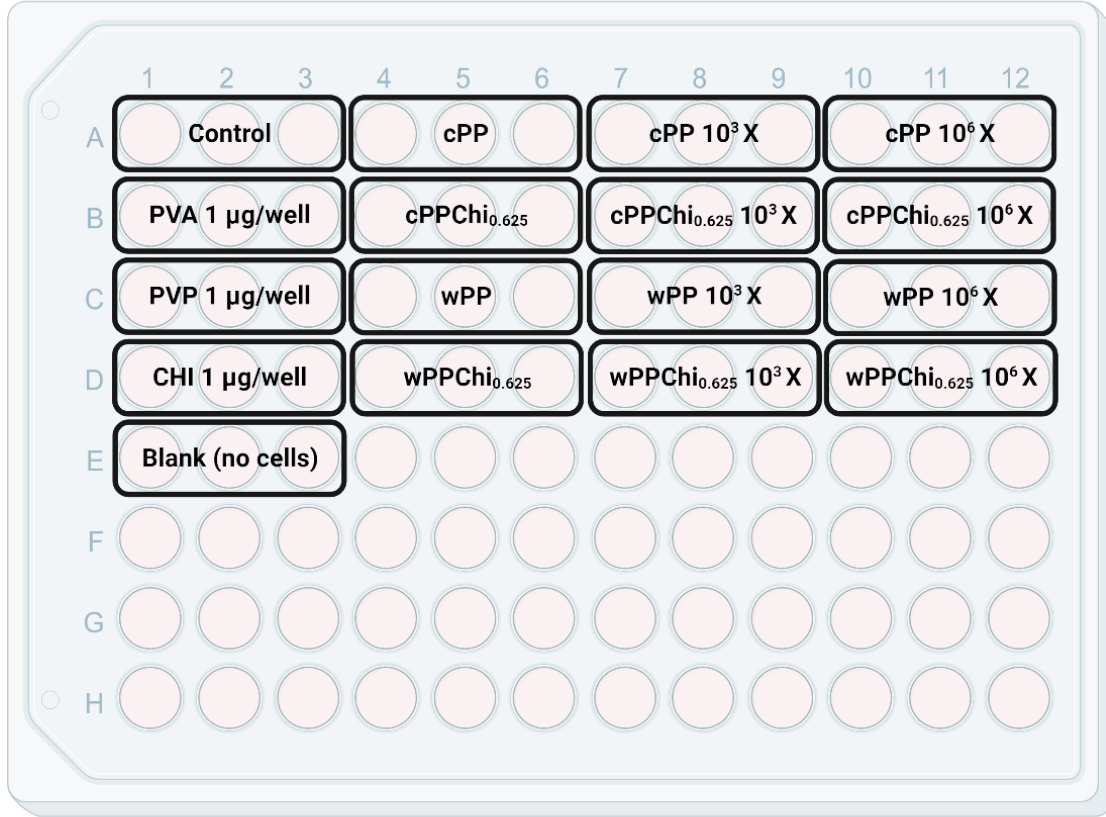

Control = 100 µL of media; Polymer (PVA/PVP/CHI) 1 µg/well = 100 µL of 10 µg/mL polymer working solution; Formulation (cPP/cPPChi<sub>0.625</sub>/wPP/wPPChi<sub>0.625</sub>) = 100 µL of undiluted hydrogel extract; Formulation (cPP/cPPChi<sub>0.625</sub>/wPP/wPPChi<sub>0.625</sub>) 10<sup>3</sup> × = 100 µL of 1:1.000 dilution of hydrogel extract; Formulation (cPP/cPPChi<sub>0.625</sub>/wPP/wPPChi<sub>0.625</sub>) 10<sup>6</sup> × = 100 µL of 1:1.000.000 dilution of hydrogel extract; Blank (no cells) = 100 µL of media.

Schematic diagram for cell treatment in the DC activation study

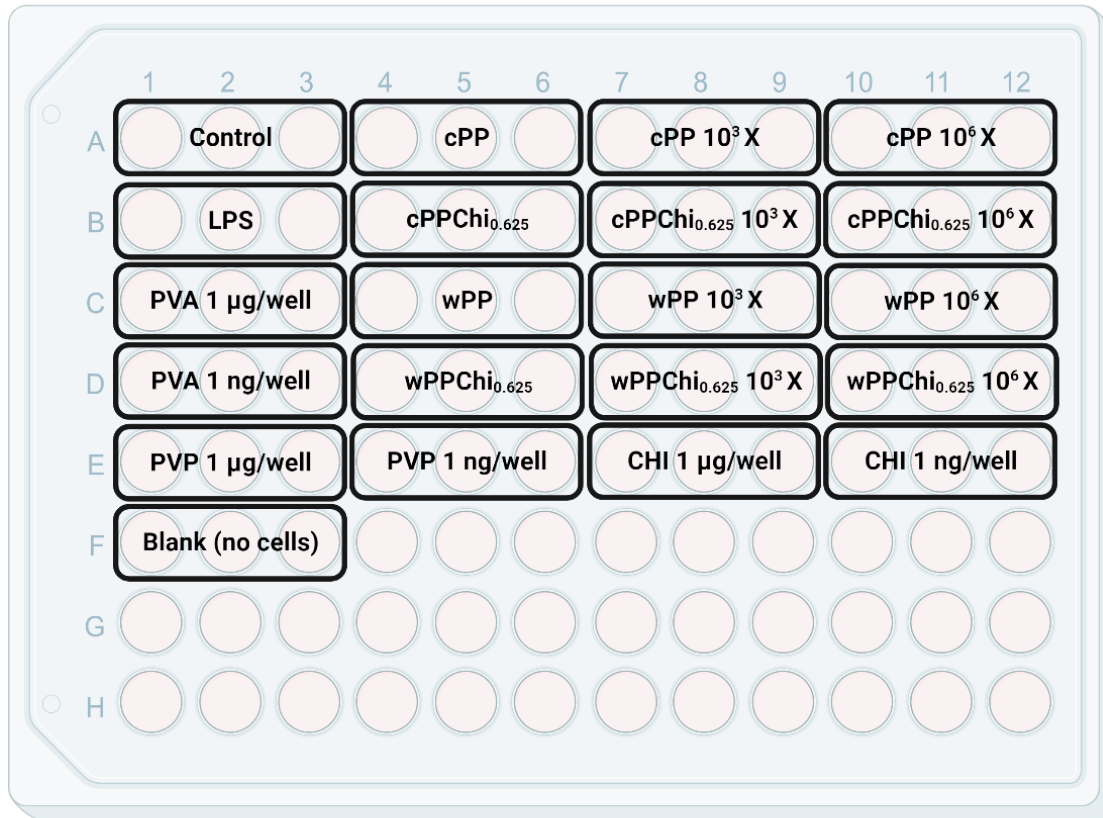

Control = 100 µL of media; LPS = 100 µL of 100 ng/mL LPS solution in supplemented RPMI-1640; Polymer (PVA/PVP/CHI) = 1 µg/well = 100 µL of 10 µg/mL polymer working solution; Polymer (PVA/PVP/CHI) = 100 µL of 10 ng/mL polymer working solution; Formulation (cPP/cPPChi<sub>0.625</sub>/wPP/wPPChi<sub>0.625</sub>) = 100 µL of undiluted hydrogel extract; Formulation (cPP/cPPChi<sub>0.625</sub>/wPP/wPPChi<sub>0.625</sub>) 10<sup>3</sup> X = 100 µL of 1:1.000 dilution of hydrogel extract; Formulation (cPP/cPPChi<sub>0.625</sub>/wPP/wPPChi<sub>0.625</sub>) 10<sup>6</sup> X = 100 µL of 1:1.000.000 dilution of hydrogel extract; Blank (no cells) = 100 µL of media.

## **Preparation of the treatment solution.**

### *Preparation of hydrogel extracts in cell expansion medium*

Approximately 60 mg of each hydrogel formulation (cPP, cPPChi<sub>0.625</sub>, wPP, wPPChi<sub>0.625</sub>) was placed in a 6-well plate and sterilized under UV light. The hydrogels were then immersed in 1.2 mL of supplemented RPMI-1640 medium for 24 hours. After discarding the swollen hydrogels, the remaining media, referred to as undiluted hydrogel extracts, were collected. These extracts were further diluted 10<sup>3</sup>- and 10<sup>6</sup>-fold with fresh supplemented RPMI-1640 medium to obtain diluted hydrogel extracts.

### *Preparation of polymer solutions in cell expansion medium*

Aqueous solutions of PVA and PVP were prepared by dissolving 20 mg of each polymer in 10 mL of Milli-Q water. The chitosan solution was prepared in an acidic environment using 1% acetic acid and was subsequently neutralized with sodium hydroxide. The final concentration of each polymer solution was 2 mg/mL. These stock solutions were then diluted with supplemented RPMI-1640 medium to create working solutions of 10 µg/mL and 10 ng/mL.

The complete IR spectra from wavenumbers 4000 cm<sup>-1</sup> to 750 cm<sup>-1</sup> of the hydrogels and their individual constituent

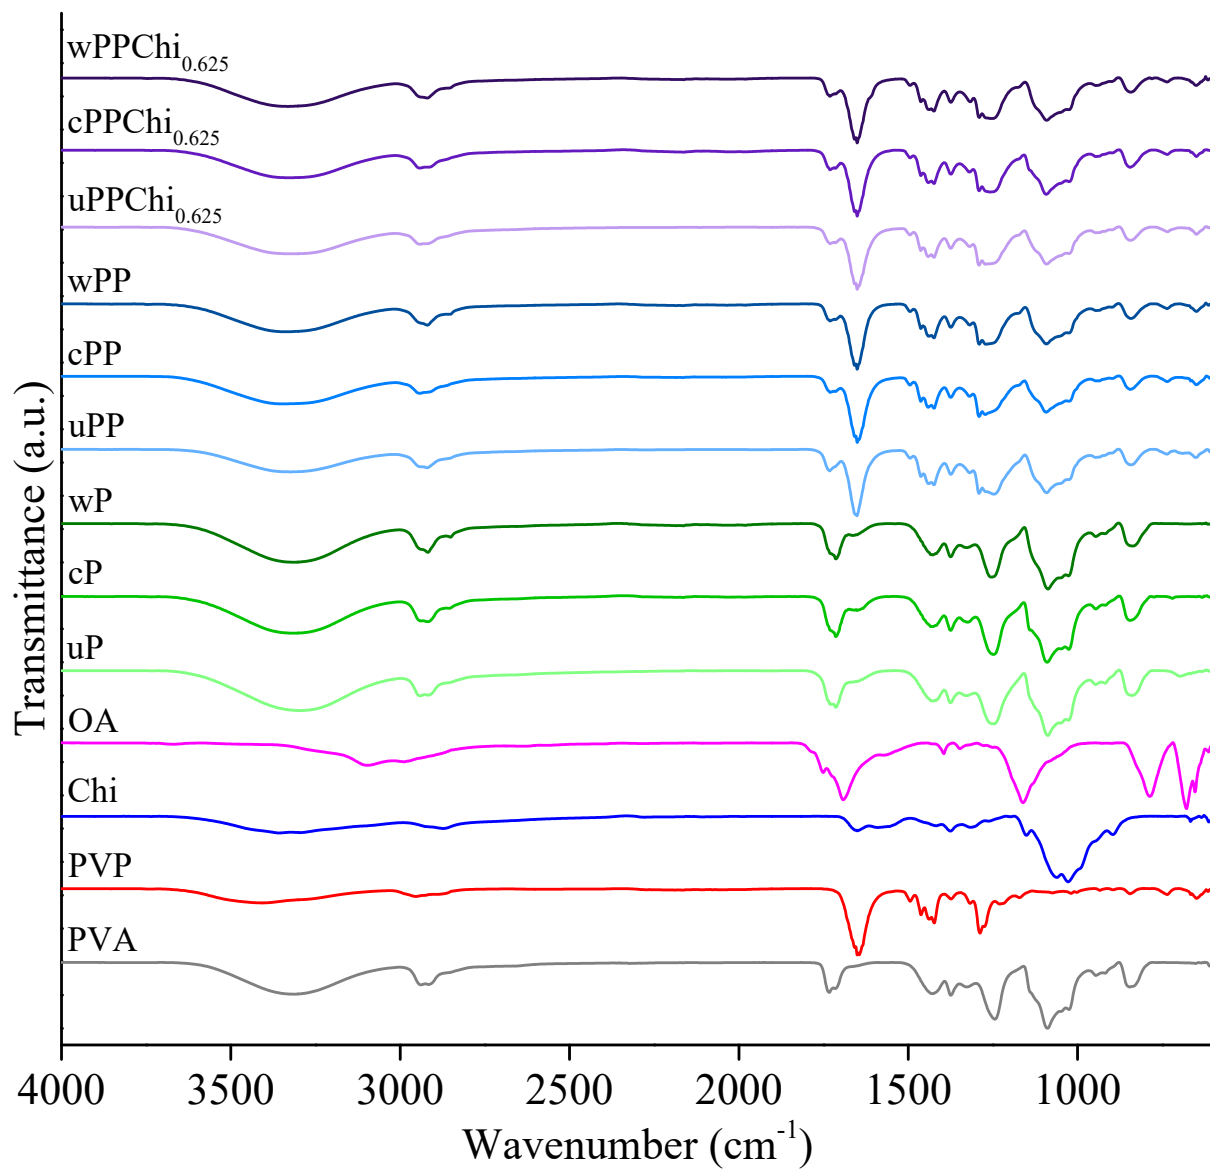



The list of peaks of interest from all constituent materials

| Chemical group vibrational mode  | Wavenumber (cm <sup>-1</sup> ) |      |            |      |
|----------------------------------|--------------------------------|------|------------|------|
|                                  | PVA                            | PVP  | Chi        | OA   |
| $\nu$ O-H water (moisture)       | -                              | 3425 | -          | -    |
| $\nu$ O-H alcohol*/carbohydrate† | 3328                           | -    | 3360       | -    |
| $\nu$ N-H amine                  | -                              | -    | 3360, 3294 | -    |
| $\nu$ O-H acid                   | -                              | -    | -          | 3101 |
| $\nu$ C-H asymmetric, ring       | -                              | 2954 | 2921       | -    |
| $\nu$ C-H asymmetric, chain      | 2939                           | 2982 | -          | -    |
| $\nu$ C-H symmetric, chain       | 2917                           | 2925 | -          | -    |
| $\nu$ C-H symmetric, ring        | -                              | 2897 | 2875       | -    |
| $\nu$ C=O ester, saturated       | 1733                           | -    | -          | -    |
| $\nu$ C=O ester, unsaturated     | 1716                           | -    | -          | -    |
| $\nu$ C=O carboxylic acid        | -                              | -    | -          | 1693 |
| $\nu$ C=O amide (amide I)        | -                              | 1651 | 1651       | -    |
| $\delta$ N-H amide (amide II)    | -                              | -    | 1593       | -    |
| $\nu$ C-N                        | -                              | 1288 | -          | -    |
| $\nu$ C-O (crystallinity)        | 1141                           | -    | -          | -    |
| $\nu$ C-O-C (glycosidic linkage) | -                              | -    | 1151       | -    |
| $\nu$ C-O-C (carbohydrate ring)  | -                              | -    | 1028       | -    |
| $\nu$ C-O (saccharide vibration) | -                              | -    | 665        | -    |
